# Supplementary material for: Cuticular Hydrocarbon Plasticity in Three Rice Planthopper Species
Source: MDPI journal article supplement (doi:10.3390/ijms22147733), 2021-07-20
Supplement: s1 [file s1]

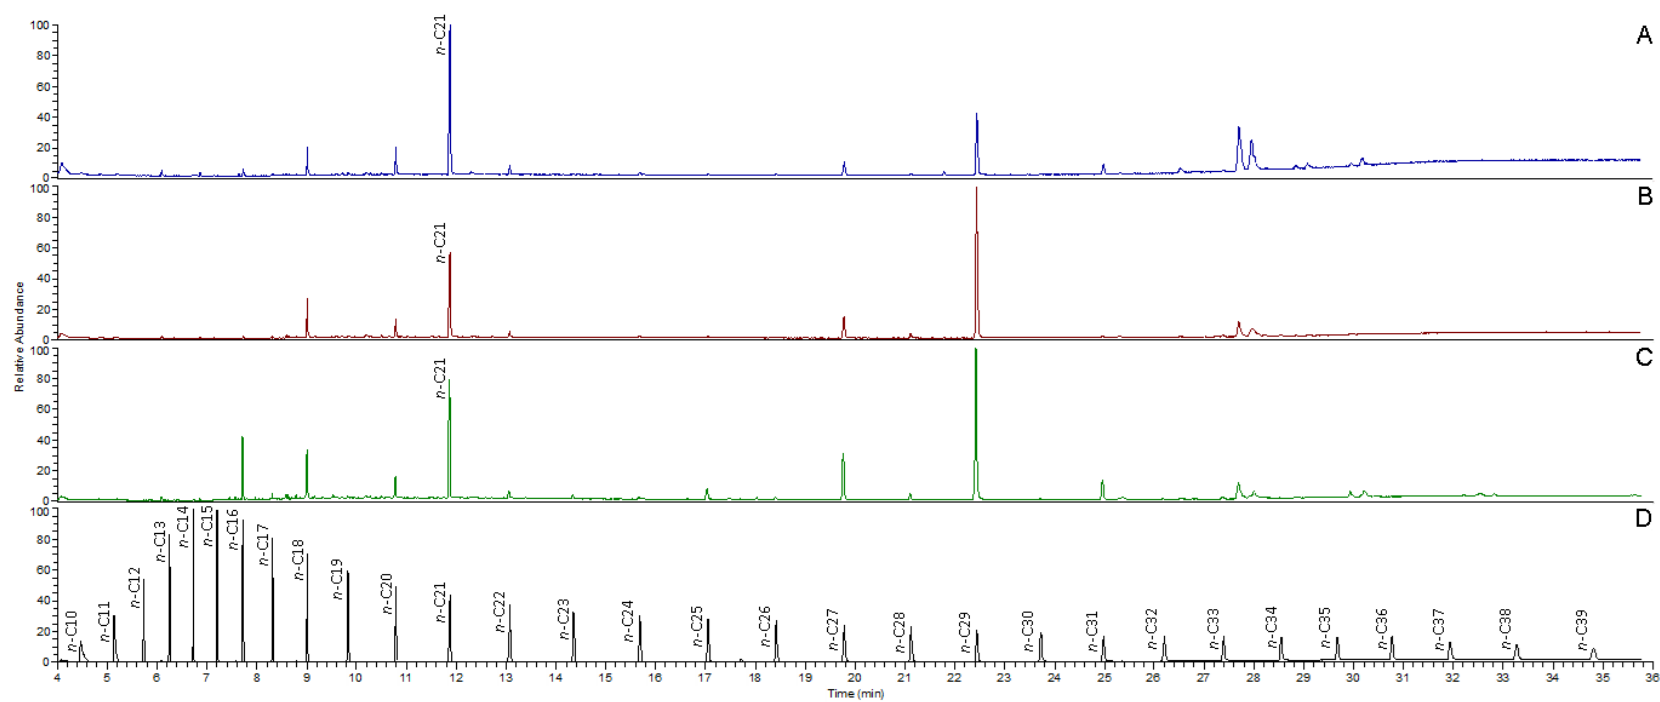

**Figure S1.** GC-MS analysis of CHCs. The CHC profiles are shown for the planthopper female adults (A. BPH, B. SBPH, C. WBPH, D. C<sub>10</sub>-C<sub>39</sub> *n*-alkanes standard).

**Table S1.** Composition of cuticular hydrocarbons in different developmental stages/sexes for BPH

| Compound             | Female adult | Male adult | 5 <sup>th</sup> -instar nymph | 2 <sup>nd</sup> - instar nymph |
|----------------------|--------------|------------|-------------------------------|--------------------------------|
| <sup>a</sup> SumCHCs | 13.79±6.72   | 14.51±5.26 | 20.10±5.34                    | 8.27±2.30                      |
| C <sub>10</sub>      | 0.86 %       | 0.97 %     | 0.66 %                        | 0.56 %                         |
| C <sub>11</sub>      | 1.16 %       | 0.88 %     | 1.06 %                        | 0.86 %                         |
| C <sub>12</sub>      | 0.10 %       | 0.04 %     | 0.06 %                        | 0.20 %                         |
| C <sub>13</sub>      | 0.03 %       | 0.01 %     | 0.02 %                        | 0.03 %                         |
| C <sub>14</sub>      | 1.29 %       | 4.09 %     | 2.56 %                        | 3.71 %                         |
| C <sub>15</sub>      | 0.13 %       | 0.29 %     | 0.15 %                        | 0.21 %                         |
| C <sub>16</sub>      | 9.42 %       | 22.33 %    | 12.26 %                       | 16.86 %                        |
| C <sub>17</sub>      | 1.77 %       | 2.63 %     | 1.75 %                        | 1.88 %                         |
| C <sub>18</sub>      | 18.67 %      | 23.07 %    | 16.36 %                       | 13.54 %                        |
| C <sub>19</sub>      | 1.36 %       | 1.32 %     | 1.11 %                        | 0.77 %                         |
| C <sub>20</sub>      | 12.25 %      | 13.21 %    | 10.93 %                       | 6.60 %                         |
| C <sub>22</sub>      | 4.79 %       | 4.83 %     | 4.09 %                        | 2.44 %                         |
| C <sub>23</sub>      | 0.54 %       | 0.48 %     | 0.33 %                        | 0.25 %                         |
| C <sub>24</sub>      | 1.65 %       | 1.72 %     | 1.39 %                        | 0.84 %                         |
| C <sub>25</sub>      | 0.86 %       | 0.88 %     | 0.48 %                        | 0.31 %                         |
| C <sub>26</sub>      | 1.17 %       | 1.32 %     | 0.81 %                        | 0.53 %                         |
| C <sub>27</sub>      | 6.94 %       | 3.46 %     | 3.53 %                        | 7.91 %                         |
| C <sub>28</sub>      | 1.25 %       | 1.40 %     | 1.10 %                        | 1.08 %                         |
| C <sub>29</sub>      | 29.49 %      | 11.74 %    | 39.43 %                       | 39.99 %                        |
| C <sub>30</sub>      | 0.61 %       | 0.91 %     | 0.49 %                        | 0.30 %                         |
| C <sub>31</sub>      | 4.45 %       | 2.92 %     | 1.07 %                        | 0.90 %                         |
| C <sub>32</sub>      | 0.19 %       | 0.48 %     | 0.10 %                        | 0.06 %                         |
| C <sub>33</sub>      | 0.86 %       | 0.63 %     | 0.16 %                        | 0.09 %                         |
| C <sub>34</sub>      | 0.06 %       | 0.18 %     | 0.02 %                        | 0.03 %                         |
| C <sub>35</sub>      | 0.02 %       | 0.10 %     | 0.02 %                        | 0.01 %                         |
| C <sub>36</sub>      | 0.02 %       | 0.03 %     | 0.01 %                        | 0.01 %                         |
| C <sub>37</sub>      | 0.01 %       | 0.03 %     | 0.03 %                        | 0.01 %                         |
| C <sub>38</sub>      | 0.04 %       | 0.03 %     | 0.02 %                        | 0.01 %                         |

<sup>a</sup> The results were calculated from ten biological replicates (nanogram per insect ± SE).

**Table S2.** Composition of cuticular hydrocarbons in different developmental stages/sexes feeding on different hosts for SBPH

| Compound              | Female adult |            | Male adult |            | 5 <sup>th</sup> -instar nymph |            | 2 <sup>nd</sup> - instar nymph |           |
|-----------------------|--------------|------------|------------|------------|-------------------------------|------------|--------------------------------|-----------|
|                       | Rice         | Wheat      | Rice       | Wheat      | Rice                          | Wheat      | Rice                           | Wheat     |
| <b>SumCHCs</b>        | 48.68±6.62   | 30.20±3.23 | 36.48±2.49 | 29.90±2.05 | 32.09±4.78                    | 23.96±3.23 | 7.04±1.53                      | 9.82±0.63 |
| <b>C<sub>10</sub></b> | 0.40 %       | 0.46 %     | 0.39 %     | 0.32 %     | 0.46 %                        | 0.66 %     | 0.67 %                         | 0.02 %    |
| <b>C<sub>11</sub></b> | 0.77 %       | 2.59 %     | 0.66 %     | 3.35 %     | 1.33 %                        | 1.36 %     | 1.22 %                         | 0.68 %    |
| <b>C<sub>12</sub></b> | 0.02 %       | 0.05 %     | 0.02 %     | 0.08 %     | 0.03 %                        | 0.06 %     | 0.03 %                         | 0.16 %    |
| <b>C<sub>13</sub></b> | 0.01 %       | 0.02 %     | 0.00 %     | 0.03 %     | 0.01 %                        | 0.01 %     | 0.01 %                         | 0.18 %    |
| <b>C<sub>14</sub></b> | 0.06 %       | 0.10 %     | 0.10 %     | 0.13 %     | 1.20 %                        | 0.30 %     | 0.27 %                         | 0.32 %    |
| <b>C<sub>15</sub></b> | 0.05 %       | 0.11 %     | 0.04 %     | 0.15 %     | 0.19 %                        | 0.15 %     | 0.10 %                         | 0.30 %    |
| <b>C<sub>16</sub></b> | 2.61 %       | 4.41 %     | 4.02 %     | 3.35 %     | 11.60 %                       | 11.40 %    | 6.79 %                         | 4.68 %    |
| <b>C<sub>17</sub></b> | 0.63 %       | 0.96 %     | 0.69 %     | 0.86 %     | 1.68 %                        | 1.77 %     | 1.04 %                         | 1.50 %    |
| <b>C<sub>18</sub></b> | 7.96 %       | 10.41 %    | 7.94 %     | 8.59 %     | 19.12 %                       | 15.61 %    | 12.19 %                        | 11.02 %   |
| <b>C<sub>19</sub></b> | 0.48 %       | 0.83 %     | 0.48 %     | 0.69 %     | 0.91 %                        | 1.19 %     | 0.86 %                         | 1.10 %    |
| <b>C<sub>20</sub></b> | 5.25 %       | 8.39 %     | 5.54 %     | 6.59 %     | 9.31 %                        | 10.31 %    | 9.18 %                         | 8.04 %    |
| <b>C<sub>22</sub></b> | 2.08 %       | 3.25 %     | 2.24 %     | 2.61 %     | 3.32 %                        | 4.07 %     | 3.41 %                         | 5.74 %    |
| <b>C<sub>23</sub></b> | 0.42 %       | 1.31 %     | 0.31 %     | 0.79 %     | 0.35 %                        | 1.00 %     | 0.34 %                         | 3.78 %    |
| <b>C<sub>24</sub></b> | 0.79 %       | 1.28 %     | 0.82 %     | 1.12 %     | 1.16 %                        | 1.95 %     | 1.16 %                         | 3.14 %    |
| <b>C<sub>25</sub></b> | 1.07 %       | 2.52 %     | 5.56 %     | 13.81 %    | 0.69 %                        | 1.58 %     | 0.71 %                         | 2.06 %    |
| <b>C<sub>26</sub></b> | 0.66 %       | 0.87 %     | 0.78 %     | 1.07 %     | 0.85 %                        | 1.39 %     | 1.06 %                         | 1.97 %    |
| <b>C<sub>27</sub></b> | 10.11 %      | 5.14 %     | 12.29 %    | 9.63 %     | 9.24 %                        | 5.31 %     | 24.71 %                        | 14.12 %   |
| <b>C<sub>28</sub></b> | 1.89 %       | 1.77 %     | 1.77 %     | 1.76 %     | 1.47 %                        | 1.82 %     | 1.65 %                         | 2.55 %    |
| <b>C<sub>29</sub></b> | 62.26 %      | 50.39 %    | 53.87 %    | 40.79 %    | 35.67 %                       | 37.73 %    | 33.49 %                        | 36.43 %   |
| <b>C<sub>30</sub></b> | 0.30 %       | 0.51 %     | 0.33 %     | 0.45 %     | 0.33 %                        | 0.59 %     | 0.29 %                         | 0.65 %    |
| <b>C<sub>31</sub></b> | 0.99 %       | 2.78 %     | 0.97 %     | 1.81 %     | 0.40 %                        | 0.75 %     | 0.34 %                         | 0.68 %    |
| <b>C<sub>32</sub></b> | 0.17 %       | 0.27 %     | 0.19 %     | 0.29 %     | 0.16 %                        | 0.24 %     | 0.14 %                         | 0.24 %    |
| <b>C<sub>33</sub></b> | 0.59 %       | 1.13 %     | 0.69 %     | 1.42 %     | 0.29 %                        | 0.48 %     | 0.24 %                         | 0.41 %    |
| <b>C<sub>34</sub></b> | 0.41 %       | 0.34 %     | 0.23 %     | 0.25 %     | 0.16 %                        | 0.18 %     | 0.03 %                         | 0.20 %    |
| <b>C<sub>35</sub></b> | 0.01 %       | 0.02 %     | 0.01 %     | 0.01 %     | 0.01 %                        | 0.01 %     | 0.01 %                         | -         |
| <b>C<sub>36</sub></b> | 0.02 %       | 0.05 %     | 0.03 %     | 0.05 %     | 0.02 %                        | 0.04 %     | 0.02 %                         | 0.03 %    |
| <b>C<sub>37</sub></b> | 0.01 %       | 0.01 %     | 0.01 %     | 0.01 %     | 0.01 %                        | 0.01 %     | 0.01 %                         | 0.01 %    |
| <b>C<sub>38</sub></b> | 0.01 %       | 0.02 %     | 0.01 %     | 0.02 %     | 0.01 %                        | 0.01 %     | 0.01 %                         | 0.01 %    |

**Table S3.** Composition of cuticular hydrocarbons in different developmental stages/sexes feeding on different hosts for WBPH

| Compound              | Female adult |            | Male adult |            | 5 <sup>th</sup> -instar nymph |            | 2 <sup>nd</sup> - instar nymph |            |
|-----------------------|--------------|------------|------------|------------|-------------------------------|------------|--------------------------------|------------|
|                       | Rice         | Wheat      | Rice       | Wheat      | Rice                          | Wheat      | Rice                           | Wheat      |
| <b>SumCHCs</b>        | 51.43±2.70   | 60.21±7.46 | 47.31±6.53 | 48.57±5.60 | 42.17±5.76                    | 38.56±2.92 | 9.71±1.86                      | 16.67±3.03 |
| <b>C<sub>10</sub></b> | 0.24 %       | 0.01 %     | 0.27 %     | -          | 0.33 %                        | 0.01 %     | 0.35 %                         | 0.01 %     |
| <b>C<sub>11</sub></b> | 0.99 %       | 0.35 %     | 2.55 %     | 0.50 %     | 3.94 %                        | 0.70 %     | 4.26 %                         | 0.12 %     |
| <b>C<sub>12</sub></b> | 0.02 %       | 0.03 %     | 0.04 %     | 0.03 %     | 0.07 %                        | 0.03 %     | 0.07 %                         | 0.01 %     |
| <b>C<sub>13</sub></b> | -            | 0.04 %     | 0.01 %     | 0.03 %     | 0.02 %                        | 0.06 %     | 0.02 %                         | 0.02 %     |
| <b>C<sub>14</sub></b> | 0.14 %       | 0.02 %     | 0.04 %     | 0.03 %     | 0.11 %                        | 0.02 %     | 0.06 %                         | 0.02 %     |
| <b>C<sub>15</sub></b> | 0.07 %       | 0.03 %     | 0.07 %     | 0.04 %     | 0.08 %                        | 0.05 %     | 0.08 %                         | 0.03 %     |
| <b>C<sub>16</sub></b> | 5.32 %       | 0.81 %     | 2.48 %     | 1.11 %     | 2.31 %                        | 0.90 %     | 4.93 %                         | 0.88 %     |
| <b>C<sub>17</sub></b> | 0.79 %       | 0.49 %     | 0.55 %     | 0.50 %     | 0.52 %                        | 0.65 %     | 0.87 %                         | 0.47 %     |
| <b>C<sub>18</sub></b> | 10.25 %      | 5.99 %     | 7.79 %     | 5.66 %     | 7.21 %                        | 8.14 %     | 12.26 %                        | 4.99 %     |
| <b>C<sub>19</sub></b> | 0.63 %       | 0.70 %     | 0.47 %     | 0.62 %     | 0.54 %                        | 1.05 %     | 0.72 %                         | 0.58 %     |
| <b>C<sub>20</sub></b> | 5.74 %       | 4.99 %     | 4.78 %     | 4.72 %     | 5.96 %                        | 7.78 %     | 7.32 %                         | 4.31 %     |
| <b>C<sub>22</sub></b> | 2.24 %       | 3.12 %     | 1.94 %     | 2.99 %     | 2.56 %                        | 4.86 %     | 2.81 %                         | 2.69 %     |
| <b>C<sub>23</sub></b> | 1.74 %       | 2.29 %     | 2.47 %     | 2.53 %     | 1.44 %                        | 3.32 %     | 1.68 %                         | 2.33 %     |
| <b>C<sub>24</sub></b> | 0.90 %       | 1.43 %     | 0.78 %     | 1.43 %     | 1.08 %                        | 2.16 %     | 1.26 %                         | 1.27 %     |
| <b>C<sub>25</sub></b> | 2.79 %       | 2.16 %     | 2.58 %     | 2.29 %     | 2.72 %                        | 2.52 %     | 3.95 %                         | 3.05 %     |
| <b>C<sub>26</sub></b> | 0.99 %       | 1.08 %     | 1.40 %     | 1.45 %     | 1.31 %                        | 1.26 %     | 1.33 %                         | 1.09 %     |
| <b>C<sub>27</sub></b> | 13.86 %      | 13.25 %    | 24.63 %    | 21.28 %    | 16.92 %                       | 12.17 %    | 17.29 %                        | 16.69 %    |
| <b>C<sub>28</sub></b> | 2.44 %       | 2.97 %     | 2.83 %     | 2.92 %     | 2.79 %                        | 2.86 %     | 2.42 %                         | 3.03 %     |
| <b>C<sub>29</sub></b> | 45.72 %      | 53.38 %    | 40.46 %    | 45.68 %    | 48.11 %                       | 48.05 %    | 36.81 %                        | 55.73 %    |
| <b>C<sub>30</sub></b> | 0.58 %       | 0.72 %     | 0.48 %     | 0.76 %     | 0.41 %                        | 0.81 %     | 0.47 %                         | 0.52 %     |
| <b>C<sub>31</sub></b> | 3.64 %       | 4.40 %     | 2.46 %     | 3.42 %     | 1.09 %                        | 1.62 %     | 0.71 %                         | 1.29 %     |
| <b>C<sub>32</sub></b> | 0.21 %       | 0.41 %     | 0.18 %     | 0.42 %     | 0.14 %                        | 0.30 %     | 0.12 %                         | 0.23 %     |
| <b>C<sub>33</sub></b> | 0.57 %       | 1.19 %     | 0.70 %     | 1.50 %     | 0.29 %                        | 0.59 %     | 0.18 %                         | 0.54 %     |
| <b>C<sub>34</sub></b> | 0.05 %       | 0.05 %     | 0.01 %     | 0.03 %     | 0.01 %                        | 0.04 %     | -                              | 0.02 %     |
| <b>C<sub>35</sub></b> | 0.01 %       | 0.04 %     | 0.01 %     | 0.04 %     | 0.01 %                        | 0.02 %     | -                              | 0.02 %     |
| <b>C<sub>36</sub></b> | 0.05 %       | 0.02 %     | 0.01 %     | 0.03 %     | 0.01 %                        | 0.01 %     | 0.01 %                         | 0.01 %     |
| <b>C<sub>37</sub></b> | 0.01 %       | 0.01 %     | 0.01 %     | 0.01 %     | 0.01 %                        | 0.01 %     | -                              | 0.01 %     |
| <b>C<sub>38</sub></b> | 0.01 %       | 0.02 %     | -          | 0.01 %     | 0.01 %                        | 0.02 %     | 0.01 %                         | 0.01 %     |
